# Supplementary material
Source: PubMed Central journal article supplement (PMC2579367)
Supplement: 0806830105_0806830105SI.pdf [file 0806830105_0806830105SI.pdf]

# Supporting Information

Bonte *et al.* 10.1073/pnas.0806830105

## SI Text

**Consistency of Dispersal Behavior Within Individuals and Among-Trait Correlations.** A total of 58% of the tested individuals showed either ballooning or rappelling behavior. At the individual level, the dispersal mode was consistent, with only 26 individuals (8.7%) performing a mixed strategy. A total of 59.2% of the dispersing individuals did only rappel during the trials, whereas 32.1% dispersed solely by ballooning. Repeatability of the duration of either ballooning or rappelling behavior was high during the trials (ballooning:  $Z = 2.00$ ,  $P < 0.023$ ; rappelling:  $Z = 3.98$ ,  $P < 0.001$ ), with intraclass correlation coefficients of  $0.496 \pm 0.121$  SE for rappelling and  $0.312 \pm 0.151$  SE for ballooning.

Because 42% of the tested individuals showed no dispersal behavior under laboratory conditions, correlations among traits

are evident. Obviously, the total number of tiptoe events strongly correlates with the frequency of ballooning ( $R_{518} = 0.51$ ,  $P < 0.0001$ ), the frequency of rappelling ( $R_{518} = 0.65$ ,  $P < 0.001$ ), and the total duration of tiptoe behavior during a trial ( $R_{518} = 0.95$ ,  $P < 0.001$ ). The correlation with climbing activity was much weaker ( $R_{518} = 0.24$ ,  $P < 0.001$ ). These correlations remained significant when individuals with no dispersal behavior were excluded ( $R_{318}$ , respectively, 0.36, 0.32, and 0.84;  $P < 0.001$ ). Similarly, correlations between total duration of the tiptoe behavior during a trial and frequency of ballooning ( $R_{518} = 0.45$ ,  $P < 0.001$ ) and rappelling were strong ( $R_{518} = 0.63$ ,  $P < 0.001$ ). A weak positive among-individual correlation exists between web building and tiptoe frequency ( $R_{518} = 0.10$ ,  $P < 0.024$ ), but this correlation was no longer significant after Bonferroni correction. No other correlations were found.

**Table S1. Genetic variance components for all traits under study**

| Variance component         | Sire           | Sire × temp   | Dam(sire)       | Dam(sire) × temp | Residual         |
|----------------------------|----------------|---------------|-----------------|------------------|------------------|
| Climbing activity          | ≈0             | 0.116 ± 0.065 | ≈0              | ≈0               | 1.534 ± 0.109    |
| Time until maturation      | 8.545 ± 8.003  | 2.470 ± 6.920 | 5.157 ± 6.322   | ≈0               | 172.45 ± 13.828  |
| Longevity after maturation | 5.327 ± 20.468 | ≈0            | 16.943 ± 28.763 | 24.230 ± 23.964  | 455.33 ± 36.868  |
| Number of egg sacs         | 0.769 ± 0.890  | ≈0            | 0.141 ± 0.767   | ≈0               | 16.749 ± 1.680   |
| Eggs egg sac 1             | 0.005 ± 0.005  | ≈0            | ≈0              | ≈0               | 0.116 ± 0.0115   |
| Lifetime fecundity         | 0.020 ± 0.017  | ≈0            | ≈0              | ≈0               | 0.326 ± 0.032    |
| Ballooning frequency       | 0.078 ± 0.134  | 0.389 ± 0.187 | 0.004 ± 0.065   | 0.060 ± 0.121    | 1.166 ± 0.083    |
| Rappelling frequency       | 0.008 ± 0.089  | ≈0            | 0.103 ± 0.076   | 0.076 ± 0.089    | 1.546 ± 0.109    |
| Total tiptoe duration      | ≈0             | ≈0            | 19.959 ± 21.461 | 26.931 ± 24.906  | 627.211 ± 44.498 |
| Rappelling probability     | 0.071 ± 0.153  | ≈0            | 0.179 ± 0.132   | ≈0               | 0.977 ± 0.066    |
| Ballooning probability     | 0.229 ± 0.174  | 0.367 ± 0.225 | ≈0              | ≈0               | 0.852 ± 0.058    |
| Ballooning duration        | ≈0             | ≈0            | ≈0              | 0.035 ± 0.135    | 1.308 ± 0.218    |
| Rappelling duration        | ≈0             | ≈0            | ≈0              | 0.027 ± 0.062    | 1.327 ± 0.151    |
| Web building               | 0.277 ± 1.038  | ≈0            | 0.307 ± 1.088   | ≈0               | 33.432 ± 2.338   |
